# Supplementary material for: Functional trade‐offs and the phylogenetic dispersion of seed traits in a biodiversity hotspot of the Mountains of Southwest China
Source: PubMed Central journal article supplement (PMC5817125; doi:10.1002/ece3.3805), 2018-01-25

B

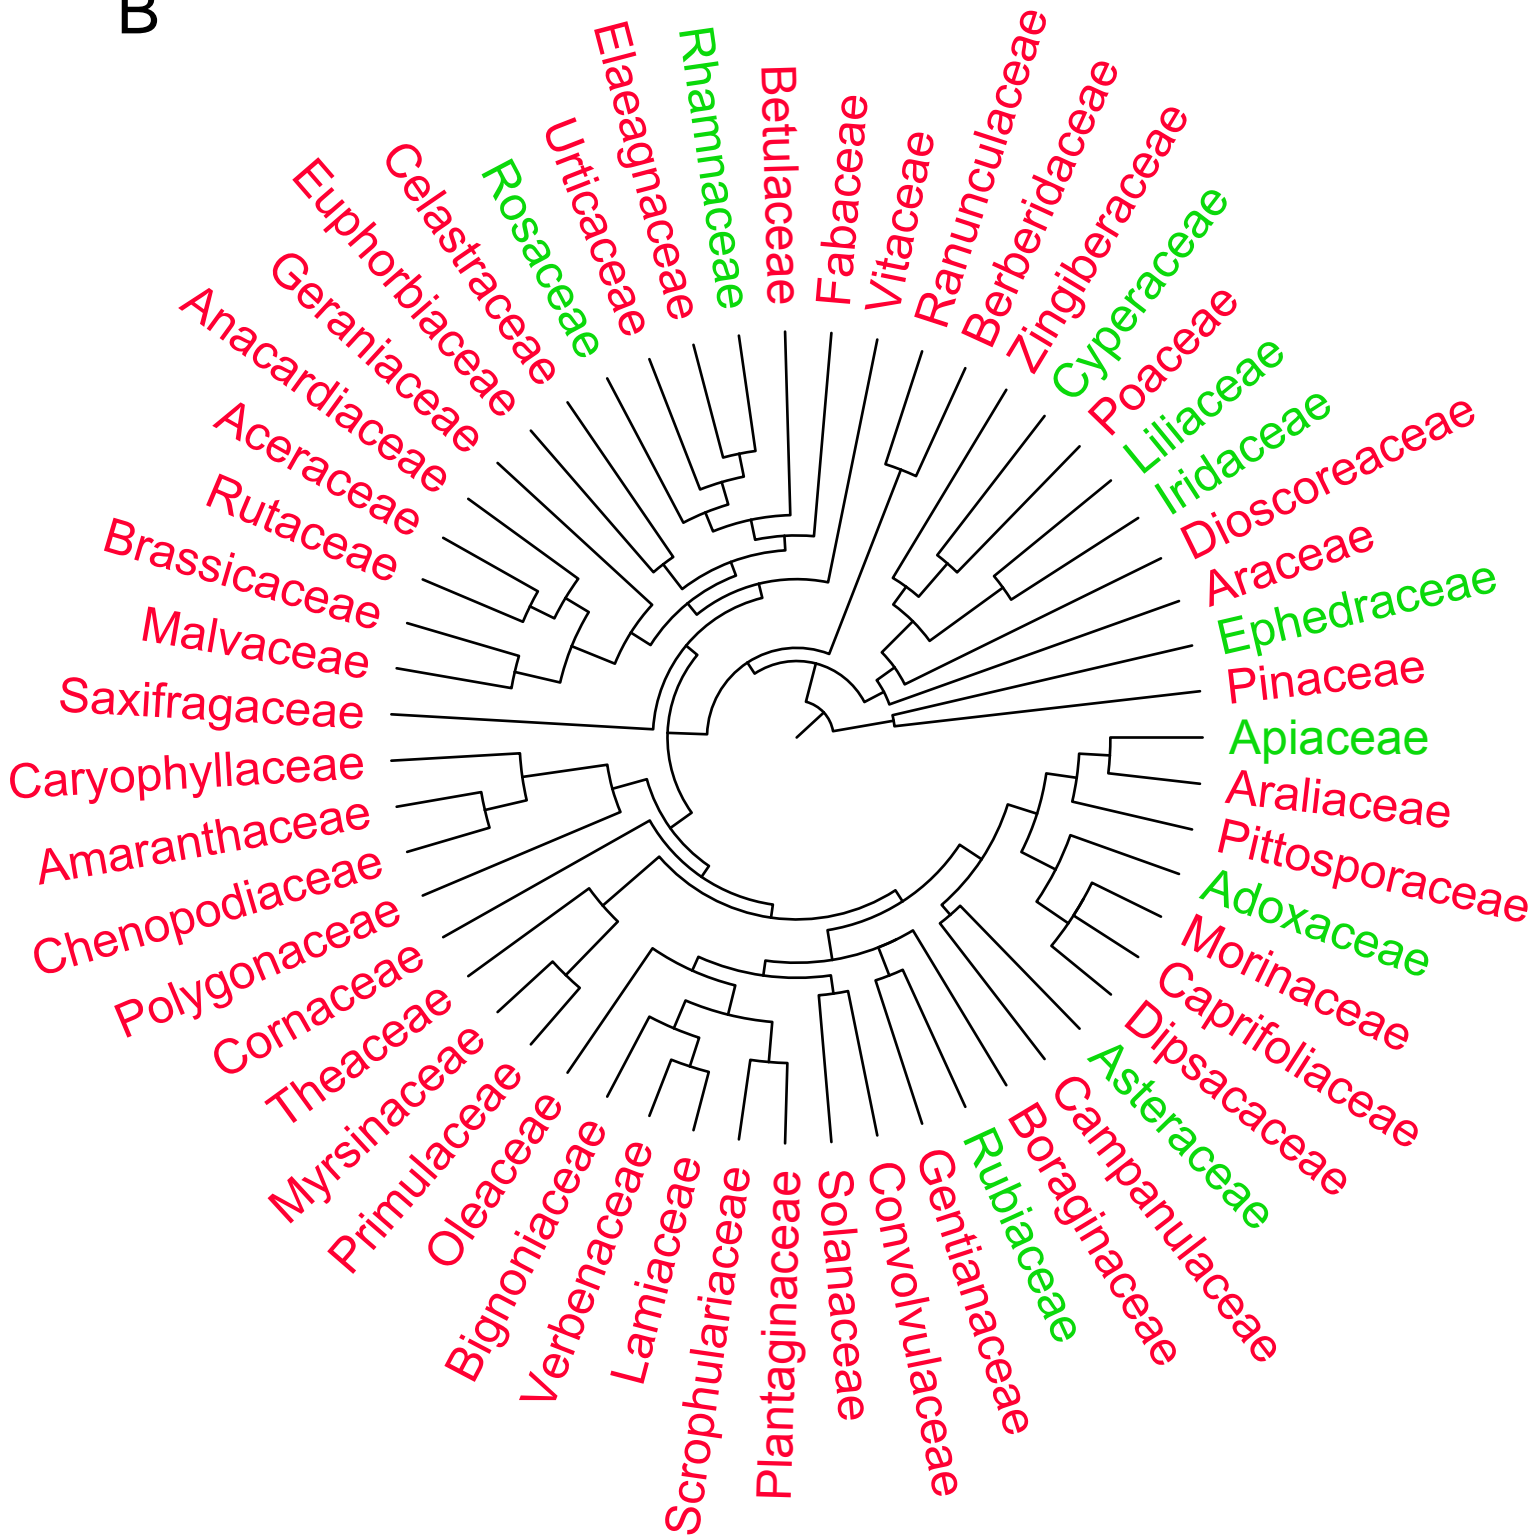

Supplement: ECE3-8-2218-s009.pdf [file ECE3-8-2218-s009.pdf]
